# Supplementary material for: Increased expression of Fibrinogen-Like Protein 2 is associated with poor prognosis in patients with clear cell renal cell carcinoma
Source: PubMed Central journal article supplement (PMC5627263; doi:10.1038/s41598-017-13149-x), 2017-10-04
Supplement: 41598_2017_13149_MOESM1_ESM.pdf [file 41598_2017_13149_MOESM1_ESM.pdf]

**Increased expression of Fibrinogen-Like Protein 2 is associated with poor prognosis in patients with clear cell renal cell carcinoma**

**Ming Tang<sup>1,\*</sup>, Xu Cao<sup>1,\*</sup>, Peng Li<sup>1</sup>, Kun Zhang<sup>1</sup>, You Li<sup>1</sup>, Quan-you Zheng<sup>1</sup>, Gui-qing Li<sup>2</sup>, Jian Chen<sup>2</sup>, Gui-lian Xu<sup>2</sup>, Ke-qin Zhang<sup>1</sup>**

<sup>1</sup>Department of Nephrology, Southwest Hospital, Third Military Medical University, Chongqing 400038, China. <sup>2</sup>Department of Immunology, Third Military Medical University, Chongqing 400038, China. \*These authors contributed equally to this work. Correspondence should be addressed to K.Z. (E-mail: [zhkq2004@163.com](mailto:zhkq2004@163.com)).

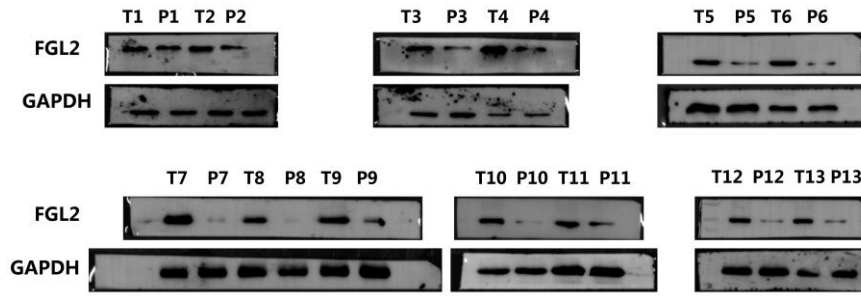

**Figure S1. FGL2 overexpression in ccRCC specimens.** The protein expression levels of FGL2 in fresh tumoural tissues and peritumoural tissues were evaluated by Western blotting assay. GAPDH was used as a loading control. P = Peritumour; T = Tumour.

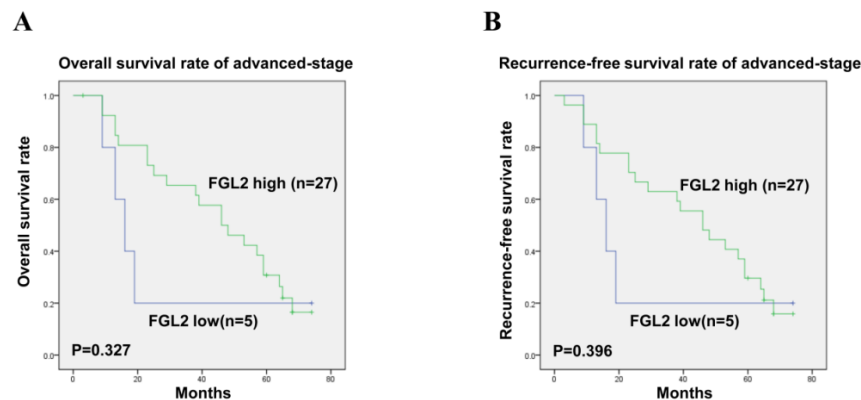

**Figure S2. Analysis of overall survival (OS) and recurrence-free survival (RFS) of patients with advanced-stage ccRCC.** (A) OS and (B) RFS of patients with advanced-stage ccRCC (TNM III+IV), according to FGL2 expression by the Kaplan-Meier survival curve and log-rank test.

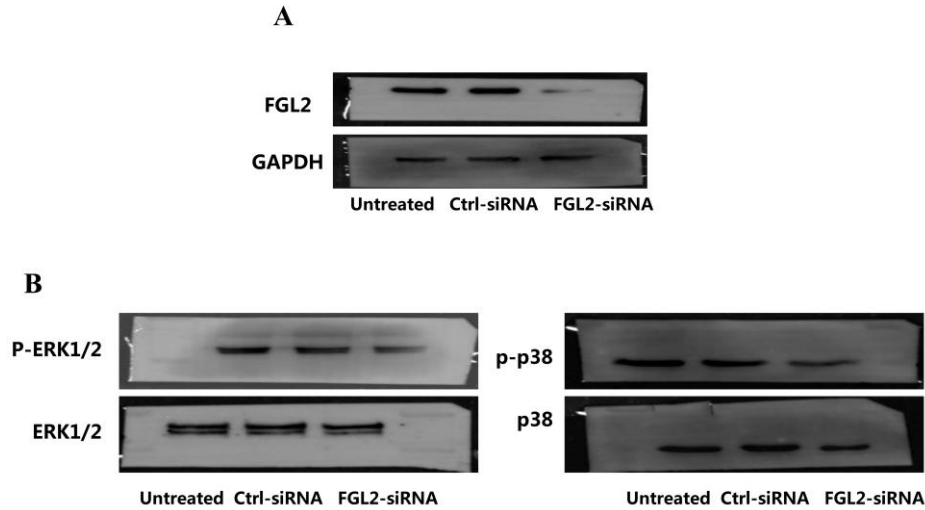

**Figure S3. The biological role of FGL2 in 786-O cells.** (A) The levels of FGL2 protein in 786-O cells were detected by Western blotting analysis and (B) representative Western blotting of phosphorylated and total ERK1/2 and p38 MAPK protein in cultured 786-O cells.

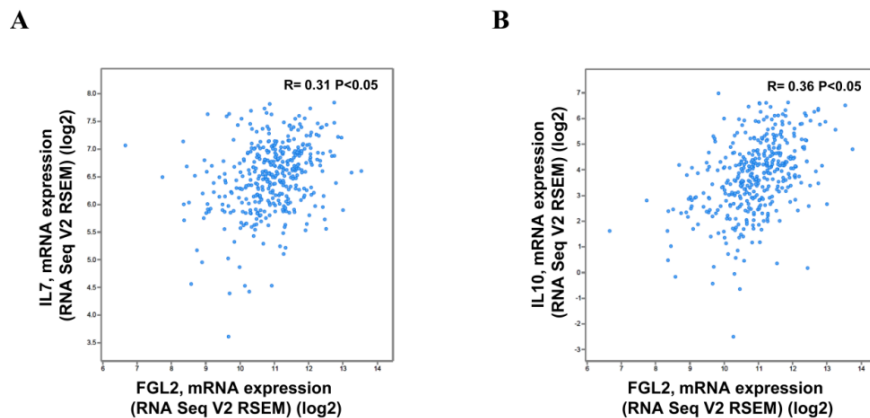

**Figure S4. Correlation analysis of mRNA expression between FGL2 and tumour-promoting factors in patients with ccRCC.** (A,B) Correlation between gene expression of the IL-17, IL-10 and FGL2 were analyzed by Pearson test. mRNA expression data of these genes from the TCGA database (2013). R = Pearson correlation coefficient.  $P < 0.05$  was regarded as statistically significant.

| NO. | Gender | Age | Operation date | NO. | Gender | Age | Operation date |
|-----|--------|-----|----------------|-----|--------|-----|----------------|
| 1   | Female | 54  | 2017/06/08     | 21  | Female | 30  | 2016/09/12     |
| 2   | Male   | 59  | 2017/06/30     | 22  | Male   | 54  | 2016/09/13     |
| 3   | Female | 30  | 2017/05/08     | 23  | Female | 65  | 2016/09/18     |
| 4   | Male   | 42  | 2017/05/15     | 24  | Male   | 37  | 2016/09/23     |
| 5   | Male   | 50  | 2017/05/23     | 25  | Male   | 42  | 2016/09/29     |
| 6   | Female | 66  | 2017/04/10     | 26  | Male   | 51  | 2016/08/09     |
| 7   | Female | 52  | 2017/04/11     | 27  | Male   | 44  | 2016/08/12     |
| 8   | Male   | 53  | 2017/04/25     | 28  | Female | 45  | 2016/08/18     |
| 9   | Male   | 52  | 2017/04/26     | 29  | Female | 56  | 2016/08/22     |
| 10  | Female | 55  | 2017/03/06     | 30  | Male   | 42  | 2016/08/23     |
| 11  | Male   | 69  | 2017/03/24     | 31  | Female | 44  | 2016/07/07     |
| 12  | Male   | 68  | 2017/03/27     | 32  | Male   | 49  | 2016/07/12     |
| 13  | Male   | 76  | 2017/03/30     | 33  | Female | 50  | 2016/07/19     |
| 14  | Male   | 56  | 2017/03/31     | 34  | Female | 66  | 2016/07/21     |
| 15  | Female | 52  | 2017/02/07     | 35  | Male   | 32  | 2016/07/25     |
| 16  | Male   | 43  | 2017/02/14     | 36  | Male   | 46  | 2016/07/26     |
| 17  | Male   | 57  | 2017/02/15     | 37  | Female | 42  | 2016/07/30     |
| 18  | Female | 56  | 2017/02/24     | 38  | Female | 61  | 2016/06/15     |
| 19  | Female | 47  | 2017/02/24     | 39  | Female | 51  | 2016/06/15     |
| 20  | Male   | 77  | 2016/09/05     |     |        |     |                |

**Supplementary Table S1. Basic information of patients with ccRCC.**
